# The inhibition of PLC $\gamma$ 1 protects chondrocytes against osteoarthritis, implicating its binding to Akt

Heguo Cai<sup>1,3,\*</sup>, Ning Qu<sup>2,\*</sup>, Xiaolei Chen<sup>1</sup>, Yang Zhou<sup>1</sup>, Xinpeng Zheng<sup>1</sup>, Bing Zhang<sup>2</sup> and Chun Xia<sup>1</sup>

<sup>1</sup>Zhongshan Hospital, Xiamen University, Fujian 361004, China

<sup>2</sup>School of Medicine, Xiamen University, Fujian 361102, China

<sup>3</sup>The Third Hospital of Xiamen, Fujian, China, Fujian 361000, China

\*These authors contributed equally to this work

Correspondence to: Bing Zhang, email: cristal66@xmu.edu.cn  
Chun Xia, email: chunxia@xmu.edu.cn

Keywords: PLC $\gamma$ 1; Akt; chondroprotection; rat OA model; OA chondrocytes

Received: July 26, 2017

Accepted: November 17, 2017

Published: December 15, 2017

Copyright: Cai et al. This is an open-access article distributed under the terms of the Creative Commons Attribution License 3.0 (CC BY 3.0), which permits unrestricted use, distribution, and reproduction in any medium, provided the original author and source are credited.

## ABSTRACT

Previous studies have addressed the involvement of phosphoinositide-specific phospholipase  $\gamma$ 1 (PLC $\gamma$ 1) and protein kinase B (PKB/Akt) in osteoarthritis (OA) pathogenesis, but it is not ascertained the possibility of them to be potential targets for OA therapy. Here, through local intra-articular injection of PLC $\gamma$  or Akt inhibitor in a rat OA model induced by anterior cruciate ligament transection plus medial meniscus resection, the architecture of chondrocyte and matrix organization of articular cartilage were observed using histopathological assays and Aggrecan, Col2, PLC $\gamma$ 1, and Akt levels were detected using immunohistochemistry assays. By treatment of Akt or PLC $\gamma$  inhibitor and transfection of different PLC $\gamma$ 1- or Akt-expressing vectors in rat OA model chondrocytes, Aggrecan, Col2, PLC $\gamma$ 1, p-PLC $\gamma$ 1, Akt, and p-Akt levels were detected using western blotting analysis. The binding between PLC $\gamma$ 1 and Akt was assessed with co-immunoprecipitation assays in human OA chondrocytes. These results showed that PLC $\gamma$  inhibition protected chondrocytes against OA, but Akt inhibition did not dramatically aggravate OA progression. There were mutual antagonism and binding between PLC $\gamma$ 1 and Akt that could be regulated by their phosphorylation levels. Consequently, the data reveal that the inhibition of PLC $\gamma$ 1 may provide an attractive therapeutic target for OA therapy, implicating its binding to Akt.

## INTRODUCTION

Osteoarthritis (OA) is a chronic and degenerative disease of articular cartilage, mainly characterized by chondrocyte death and articular cartilage matrix degradation in OA pathogenesis. Thus, either suppressing matrix degradation or promoting matrix synthesis could mitigate or prevent OA degeneration. Some signal molecules, such as p38, JNK and ERK MAP kinases, and PI-3 kinase/Akt, could regulate the expression levels of Aggrecan (a proteoglycan) and type II collagen (Col 2), which are main components in articular cartilage matrix, to suppress or promote matrix synthesis [1]. Recent studies suggest targeting some signaling molecules

in treatment of OA, because it is more effective than current treatments and less harmful to normal cells. Lentiviral vector-mediated shRNAs targeting a functional isoform of the leptin receptor (Ob-Rb) inhibit cartilage degeneration in a rat model of osteoarthritis [2]. Local intra-articular injection of rapamycin (mTOR inhibitor) or cartilage-specific deletion of mTOR can delay articular cartilage degeneration in a murine model of OA or protect mice from osteoarthritis [3, 4]. Targeting the damage-associated molecular patterns (DAMPs) may be the potential therapeutic strategies for the treatment of OA [5]. Therefore, targeting the signal molecules involved in chondrocyte metabolism may be a potent solution for OA therapy.

Phosphoinositide-specific phospholipase  $\gamma$  (PLC $\gamma$ ), including PLC $\gamma$ 1 and PLC $\gamma$ 2, could be activated by many extracellular factors to induce hydrolysis of phosphatidylinositol 4,5-bisphosphate (PtdIns(4,5)P<sub>2</sub>) to form the second messengers diacylglycerol (DAG) and inositol 1,4,5-trisphosphate (IP<sub>3</sub>). Both DAG and IP<sub>3</sub> in turn activate a number of signaling pathways to regulate cell metabolism in mammalian cells [6]. PLC $\gamma$ 1 is expressed in most mammalian cells, while PLC $\gamma$ 2 is mainly expressed in immune cells. Thus, most research focuses on PLC $\gamma$ 1. Some authors' studies have already addressed the expression pattern of PLC $\gamma$  in chondrocytes. PLC $\gamma$  is associated with the sex-specific response of rat costochondral cartilage growth plate chondrocytes to 17 $\beta$ -estradiol [7]. Periodic mechanical stress not only causes chondrocyte area expansion and migration, but also activates PLC $\gamma$ 1/Y783 [8]. Moreover, PLC $\gamma$ 1 is implicated in some important signaling pathways to regulate chondrocyte processes. PLC $\gamma$  mediated FGFR3-induced STAT1 activation and this signaling cascade involved in the induction of apoptosis in the chondrogenic cell line ATDC5 [9]. The Src-PLC $\gamma$ 1-ERK1/2 signaling transduction pathway is involved in cartilage tissue integration by affecting chondrocyte migration [10]. Periodic mechanical stress also promotes chondrocyte proliferation and matrix synthesis in part through the Src-PLC $\gamma$ 1-MEK1/2-ERK1/2 signaling pathway [11]. PDGF was able to activate the GIT1- and PLC $\gamma$ 1-mediated ERK1/2 pathway to control chondrocyte proliferation [12]. However, the role of PLC $\gamma$ 1 in OA remains clear. Our recent observation also showed that PLC $\gamma$ 1 was expressed at elevated level in human OA chondrocytes than in normal chondrocytes, serving as a pivotal element of signal cascades constituted by ERK and mTOR to promote matrix degradation in human OA chondrocytes [13, 14]. We then hypothesized that PLC $\gamma$ 1 could be involved in OA chondrocyte metabolism, contributing to matrix degradation. In addition to PLC $\gamma$ 1, protein kinase B (PKB/Akt), a crucial regulator in cell proliferation and apoptosis, has been implicated in chondrocyte processes. For example, Akt has a higher expression in normal chondrocytes than in OA chondrocytes, required for both basal and insulin-induced type II collagen (Col 2) expression in chondrocytes [15]. The expression of the Akt inhibitor called TRB3 (tribbles homolog, a pseudokinase that contains a truncated kinase domain and binds to Akt to inhibit Akt phosphorylation and activation) increases in human OA cartilage, and inhibits insulin-like growth factor 1-mediated cell survival and proteoglycan synthesis [16]. We previously show that the activation of Akt contributed to the chondroprotection of nicotine, berberine, and morroniside on OA chondrocytes through promoting matrix synthesis, respectively [17–19]. Therefore, the increased Akt has a potent chondroprotection in OA pathogenesis. However, up to date, it is not ascertained the possibility of PLC $\gamma$ 1 or Akt as a potential target for OA therapy.

Although most signal molecules have been examined in isolation, it is becoming clear that there is a significant crosstalk among them and the overall effects on OA pathogenesis depend on the balance in activity of them [1]. Investigating the crosstalk among these signal molecules is indispensable to elucidate the regulatory mechanism of OA pathogenesis. It has indicated that PLC $\gamma$  activation is partially dependent on the PI(3,4,5)P<sub>3</sub> production by activated PI3K [20], the latter could simultaneously phosphorylate Akt1/2 at Ser473/474 [21], indicating that PLC $\gamma$  and Akt share common upstreamer, PI3K. Hence, it is becoming clear that these two pathways are interconnected at several levels. Moreover, it has been reported that Akt interaction with PLC $\gamma$  regulates the G(2)/M transition triggered by FGF receptors from MDA-MB-231 breast cancer cells [22]. Our previous study indicated that the interaction between PLC $\gamma$  and Akt was involved in cell metastasis in human gastric adenocarcinoma [23]. Therefore, we hypothesize that there exists a crosstalk between PLC $\gamma$  and Akt to be involved in OA pathogenesis.

In this study, it is investigated the role of PLC $\gamma$  and Akt and the relationship between them in OA chondrocytes. We showed that local intra-articular injection of PLC $\gamma$  inhibitor could protect chondrocytes against OA in a rat OA model, whereas Akt inhibitor could not dramatically aggravate OA progression. There were mutual antagonism and binding between PLC $\gamma$ 1 and Akt that could be regulated by their phosphorylation levels. Therefore, the inhibition of PLC $\gamma$ 1 may serve as a better solution for OA therapy than Akt activation, partially, implicating its binding to Akt.

## RESULTS

### Effect of PLC $\gamma$ 1 and Akt inhibitors on articular cartilage in a rat OA model

Given the number of signal cascades triggered by activated Akt, which might make it difficult to understand its regulatory mechanism, the effect of Akt on articular cartilage was detected with the treatment of its pharmaceutical inhibitor Triciribine (TCN) in this study. Using a rat OA model induced by ACLT+MMx, we investigated the effect of PLC $\gamma$ 1 and Akt inhibition on articular cartilage with local intra-articular injection of its pharmaceutical inhibitor U73122 (U) and TCN. Rats were killed after 1 and 2 month-injection with U73122 or TCN, respectively, the specimens were then fixed, sectioned into 3  $\mu$ m thicknesses, and stained with H.E. and Safranin O –Fast green stainings. The results after injection for 1 and 2 month were shown in Figures 1 and 2, respectively. Figures 1A and 2A displayed the smooth cartilage surface of femur condyle, normal architecture of matrix, and intact and appropriate cell distribution in normal group, and the heavy degeneration of articular cartilage in both OA and

NS (OA group intra-articularly injected by 0.9% normal saline) groups. Meanwhile, in 1 month-treated groups, the injection of U73122 at different concentrations enhanced the thickness of articular cartilage in femur condyle and number of chondrocytes, and reducing the grade of Osteoarthritis Research Society International (OARSI) scoring system, in which 10  $\mu\text{g}/\text{mg}$  U73122 was most

effective, indicating the protective effect of U73122 on articular cartilage (Figure 1,  $*P < 0.05$ ,  $**P < 0.01$ ,  $***P < 0.001$ ,  $****P < 0.0001$ , vs NS group). Nevertheless, the architecture of chondrocyte and matrix of articular cartilage in TCN-treated groups at different concentrations were similar to that in NS group along with the decreased thickness of articular cartilage and increased OARSI

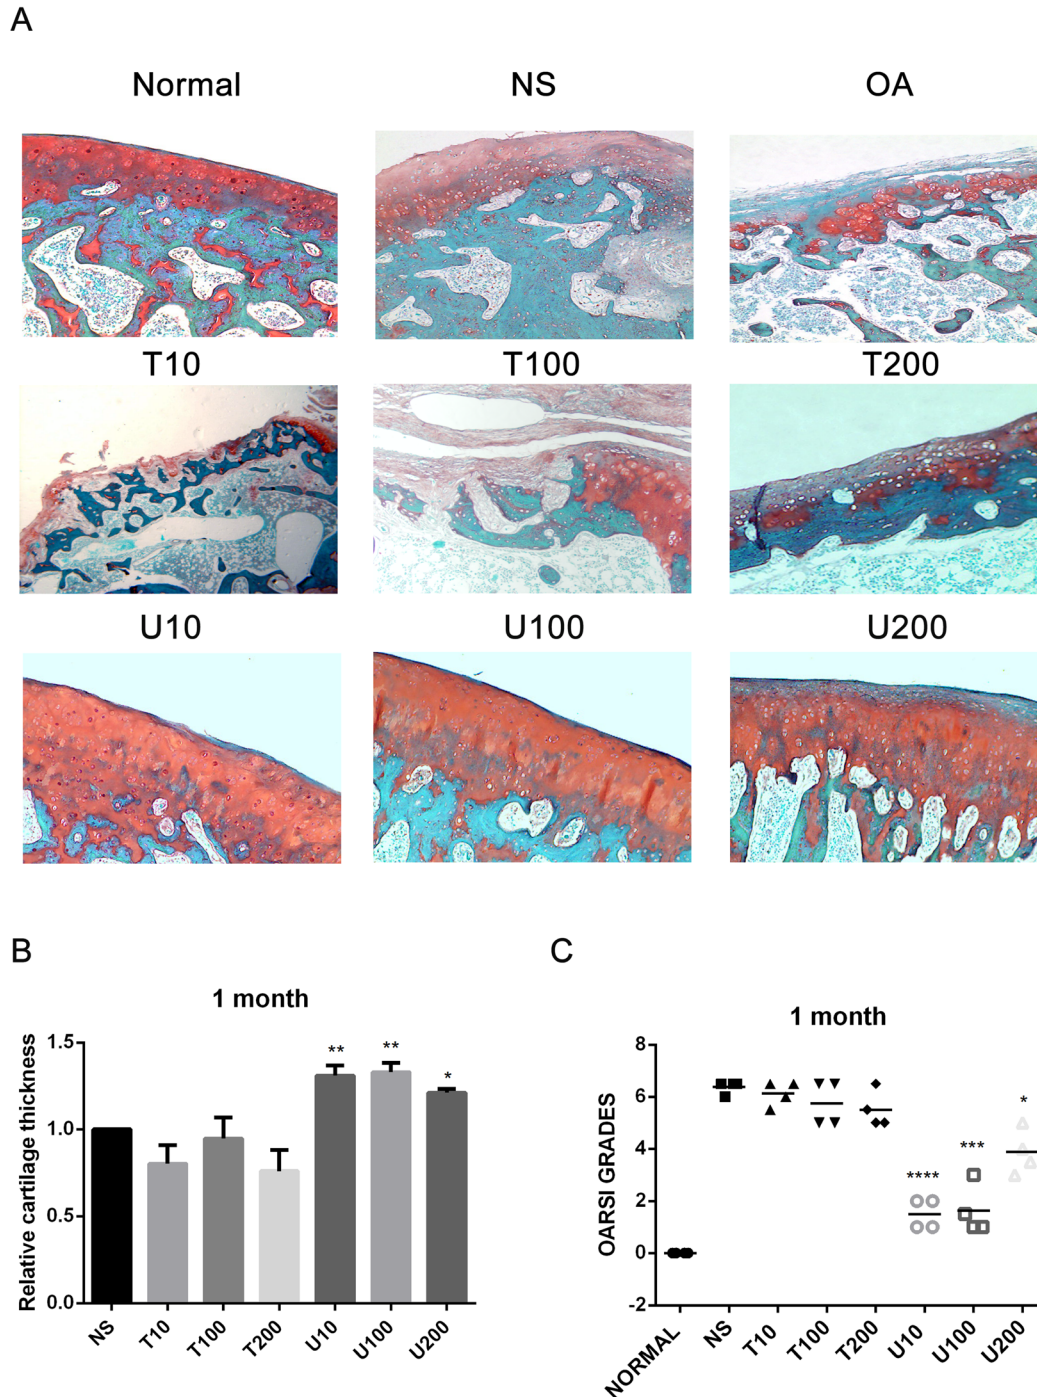

**Figure 1: Histopathological evaluation of OA in a rat OA model treated with different inhibitors of PLC $\gamma$ 1 and Akt for 1 month. (A)** Representatives images of Safranin O –Fast green staining from the rats treated by different inhibitors of PLC $\gamma$ 1 and Akt after ACLT+MMx (original magnification  $\times 100$ ). **(B)** Graph indicating the relative cartilage thickness of each femur condyle (from superficial zone to tidemark). **(C)** Graph indicating the OARSI scores ( $*P < 0.05$ ,  $**P < 0.01$ ,  $***P < 0.001$ ,  $****P < 0.0001$ , vs NS group).

scores (Figure 1). Like 1 month-treated groups, the protective effect of U73122 on OA articular cartilage was observed in 2 month-treated groups (Figure 2,  $*P < 0.05$ ,  $**P < 0.01$ ,  $***P < 0.001$ ,  $****P < 0.0001$ , vs NS group).

Although TCN (10  $\mu\text{g}/\text{kg}$ ) caused a significant decrease at the grade of OARSI scoring system compared with NS group (Figure 2C,  $**P < 0.01$ ), the other two concentration of TCN did not change the thickness of articular cartilage

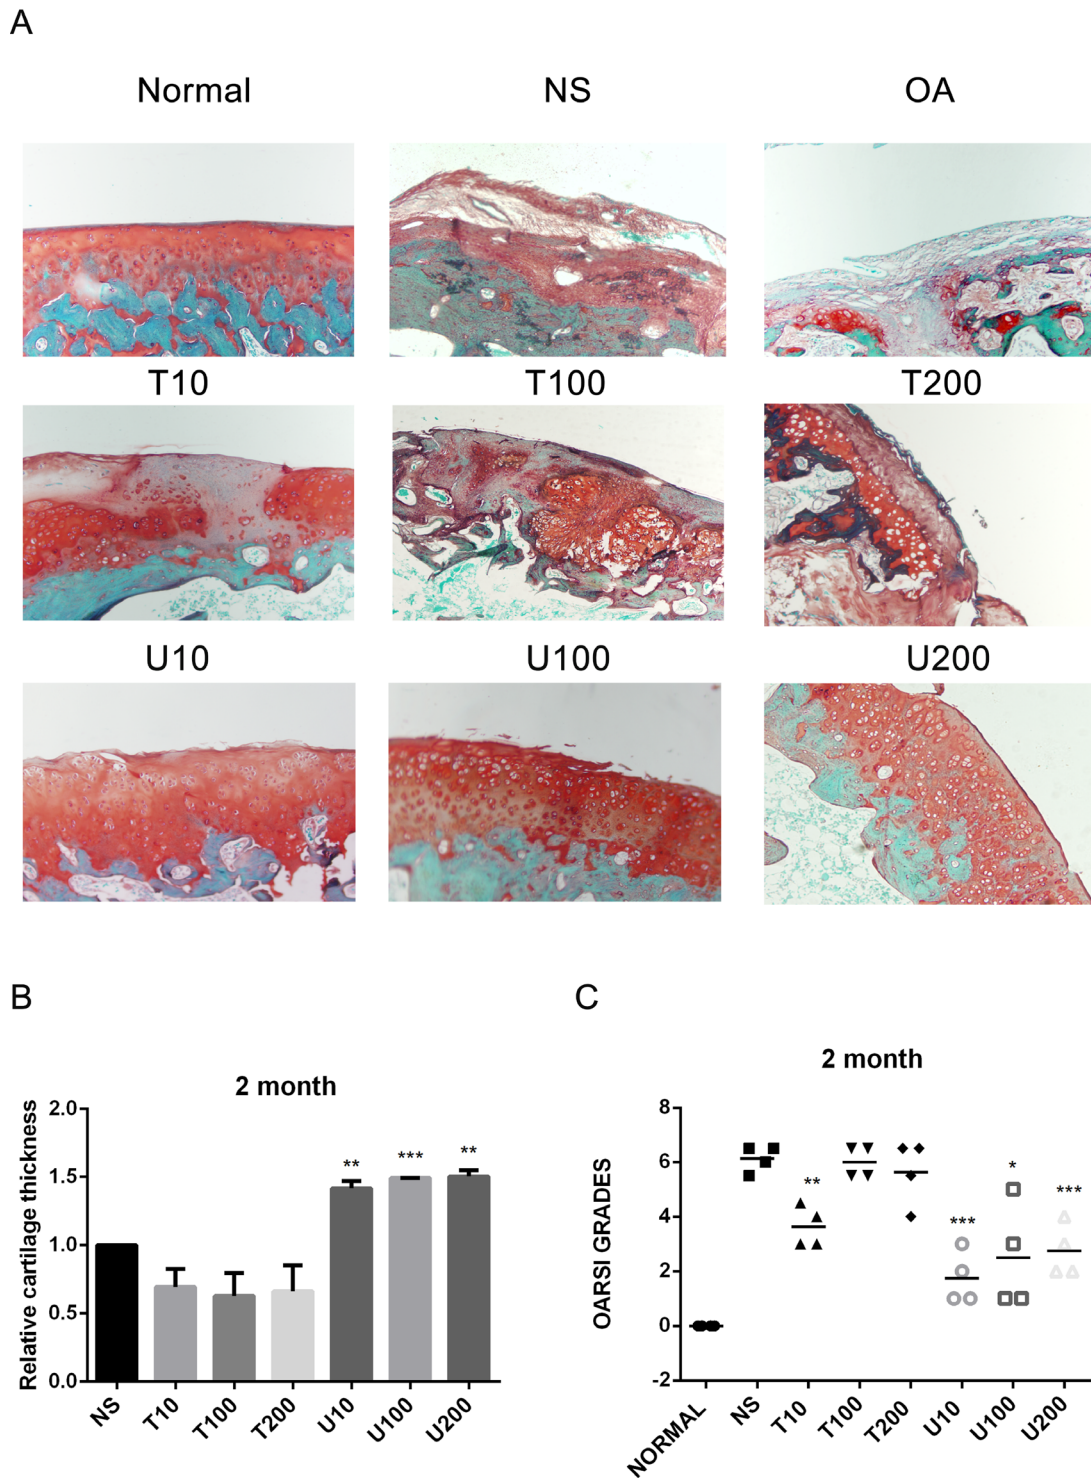

**Figure 2: Histopathological evaluation of OA in a rat OA model treated with different inhibitors of PLC $\gamma$ 1 and Akt for 2 month.** (A) Representatives images of Safranin O –Fast green staining from the rats treated by different inhibitors of PLC $\gamma$ 1 and Akt after ACLT+MMx (original magnification  $\times 100$ ). (B) Graph indicating the relative cartilage thickness of each femur condyle (from superficial zone to tidemark). (C) Graph indicating the OARSI scores ( $*P < 0.05$ ,  $**P < 0.01$ ,  $***P < 0.0001$ , vs NS group).

and OARSI scores compared with NS group. Taken the data together, U73122 treatment for either 1 or 2 month had a significant chondroprotective effect on articular cartilage in a rat OA model, but TCN had not any intensifying effect on OA cartilage degeneration.

### Effect of PLC $\gamma$ 1 inhibitor on the expression levels of Aggrecan and Col 2 in a rat OA model

Aggrecan and Collagen Type 2(Col 2) are main biomarkers of cartilage matrix synthesis, the effect of PLC $\gamma$ 1 inhibition on them was then assessed with immunohistochemistry assay in a rat OA model. Considering the heavy cartilage degeneration in NS group, the difference between U73122-treated and normal groups was analysed. In 1 month-treated group, Figure 3A showed that the expression level of Aggrecan in U73122-treated groups at different concentrations was less than that in normal group ( $***P < 0.001$ ). In 2 month-treated groups, the expression level of Aggrecan in U73122-treated groups at different concentrations was close to that in normal group (Figure 3B). These results indicated that the treatment of U73122 for 2 month enhanced the expression level of Aggrecan, reaching normal level, and that the efficacy of U73122 treatment for 1 month was inferior to that for 2 month. In addition, the expression level of Col 2 in U73122 (200  $\mu$ g/kg)-treated group at for 1 month was close to that in normal group, whereas Col 2 expressions in the other two concentrations of U73122 were significantly less than that in normal group, indicating that the efficacy of U73122 (200  $\mu$ g/kg) was superior to that of the other two groups (Figure 4A,  $**P < 0.01$ ,  $***P < 0.0001$ ). In 2 month-treated groups, the expression level of Col 2 in U73122 (10  $\mu$ g/kg)-treated group was close to that in normal group, whereas Col 2 expressions in the other two groups of U73122 were less than that in normal group, indicating that the efficacy of U73122 (10  $\mu$ g/kg) treatment was superior to that of the two other groups (Figure 4B,  $*P < 0.05$ ,  $**P < 0.01$ ). Therefore, treatment of both U73122 (200  $\mu$ g/kg, 1 month) and U73122 (10  $\mu$ g/kg, 2 month) could enhance the expression of Col 2 reaching normal level, and that the efficacy of U73122 may partially depend on the time and concentration of its treatment. Consequently, definite concentration PLC $\gamma$ 1 inhibitors promoted matrix synthesis through increasing Aggrecan and Col 2 expression levels in a rat OA model.

### Relationship between PLC $\gamma$ 1 and Akt in OA chondrocytes

To ascertain whether there is a crosstalk between PLC $\gamma$ 1 and Akt in OA pathogenesis, the expression levels of PLC $\gamma$ 1 or Akt were assessed with immunohistochemistry assay in PLC $\gamma$ 1 and Akt inhibitor-treated groups, respectively. Either 1 or 2 month-treated groups, PLC $\gamma$ 1 had

significantly higher expression in different concentration TCN-treated groups than that in normal group, indicating that TCN treatment enhanced PLC $\gamma$ 1 expression level (Figure 5,  $***P < 0.001$ ,  $****P < 0.0001$ ). Meanwhile, the treatment U73122 at different concentrations for either 1 or 2 month enhanced Akt expression level, close to that in normal group, indicating that U73122 also promoted Akt expression reaching normal level. Therefore, there was a reciprocal modulation between PLC $\gamma$ 1 and Akt, a possible mutual antagonism in chondrocytes of a rat OA model. Moreover, compared with Figures 5 and 6, the effect of U73122 on Akt expression seemed to be superior to that of TCN on PLC $\gamma$ 1 expression.

To understand the relationship between PLC $\gamma$ 1 and Akt, it was further detected the interaction between PLC $\gamma$ 1 and Akt in rat OA model chondrocytes by IL-1 $\beta$  (20 ng/ml) treatment. Given that both PLC $\gamma$ 1 and Akt, their phosphorylations are attributed to their regulatory effects on cell processes, the phosphorylation levels of PLC $\gamma$ 1 at Y783 site (p- PLC $\gamma$ 1) and Akt at S473 site (p-Akt) were measured with western blotting analysis. Figure 7A and 7B showed that TCN (10  $\mu$ M) enhanced p-PLC $\gamma$ 1 level along with the decrease in p-Akt level and that U73122 (2  $\mu$ M) enhanced p-Akt level along with the decrease in p-PLC $\gamma$ 1 level. Both of them were in a time-dependent manner. Figure 7C showed that the transfection with PLC $\gamma$ 1/Y783A mutant vector enhanced Col 2 and Aggrecan levels in rat OA model cells by IL-1 $\beta$  treatment, compared with PLC $\gamma$ 1-expressing vector group. Figure 7D showed that the transfection of Akt/S473A mutant vector reduced Col 2 and Aggrecan levels, compared with Akt-expressing vector group. These results indicated that the promoted effect of PLC $\gamma$ 1/Y783A mutant and the inhibitory effect of Akt/S473A mutant on matrix synthesis in rat OA model cells, similar to their pharmaceutical inhibitors in a rat OA model. Furthermore, a binding between PLC $\gamma$ 1 and Akt was noted in human OA chondrocytes using Co-immunoprecipitation assay (Figure 7E and 7F). Figure 7E also showed that PLC $\gamma$ 1/Y783A mutant reduced the binding between PLC $\gamma$ 1 and Akt, whereas Figure 7F indicated that Akt/S473A mutant enhanced the binding between them. Taken these data in chondrocytes *in vitro* together, there was also a reciprocal modulation between PLC $\gamma$ 1 and Akt and a binding between PLC $\gamma$ 1 and Akt, which was regulated by their phosphorylation levels.

## DISCUSSION

Given that targeting molecule therapy is thought to be an effective solution for OA therapy [2–4], and that the involvement of PLC $\gamma$ 1 and Akt in OA pathogenesis was reported by other authors' and our previous studies [7–19], we sought to the possibility that PLC $\gamma$ 1 and Akt serve as potential molecular targets for OA therapy.

PLC $\gamma$ 1 has been detected at elevated level in human OA cartilage, implicated as a possible contributor to cartilage degeneration [13, 14]. The data in the study confirmed that different concentrations of PLC $\gamma$ 1 inhibitor could lead to a significant increase of cartilage thickness and decrease of OARSI scores (Figures 1 and 2). The elevated level of Col 2 and Aggrecan expression was

measured in U73122 (PLC $\gamma$ 1 inhibitor)-treated groups (Figures 3 and 4). Similarly, PLC $\gamma$ 1/Y783A mutant also significantly delayed matrix degradation in human OA chondrocytes (Figure 7C). Thus, it is suggested that inhibition of PLC $\gamma$ 1, including its expression and phosphorylation, could protect chondrocytes against OA. In contrast, it has been addressed that activated

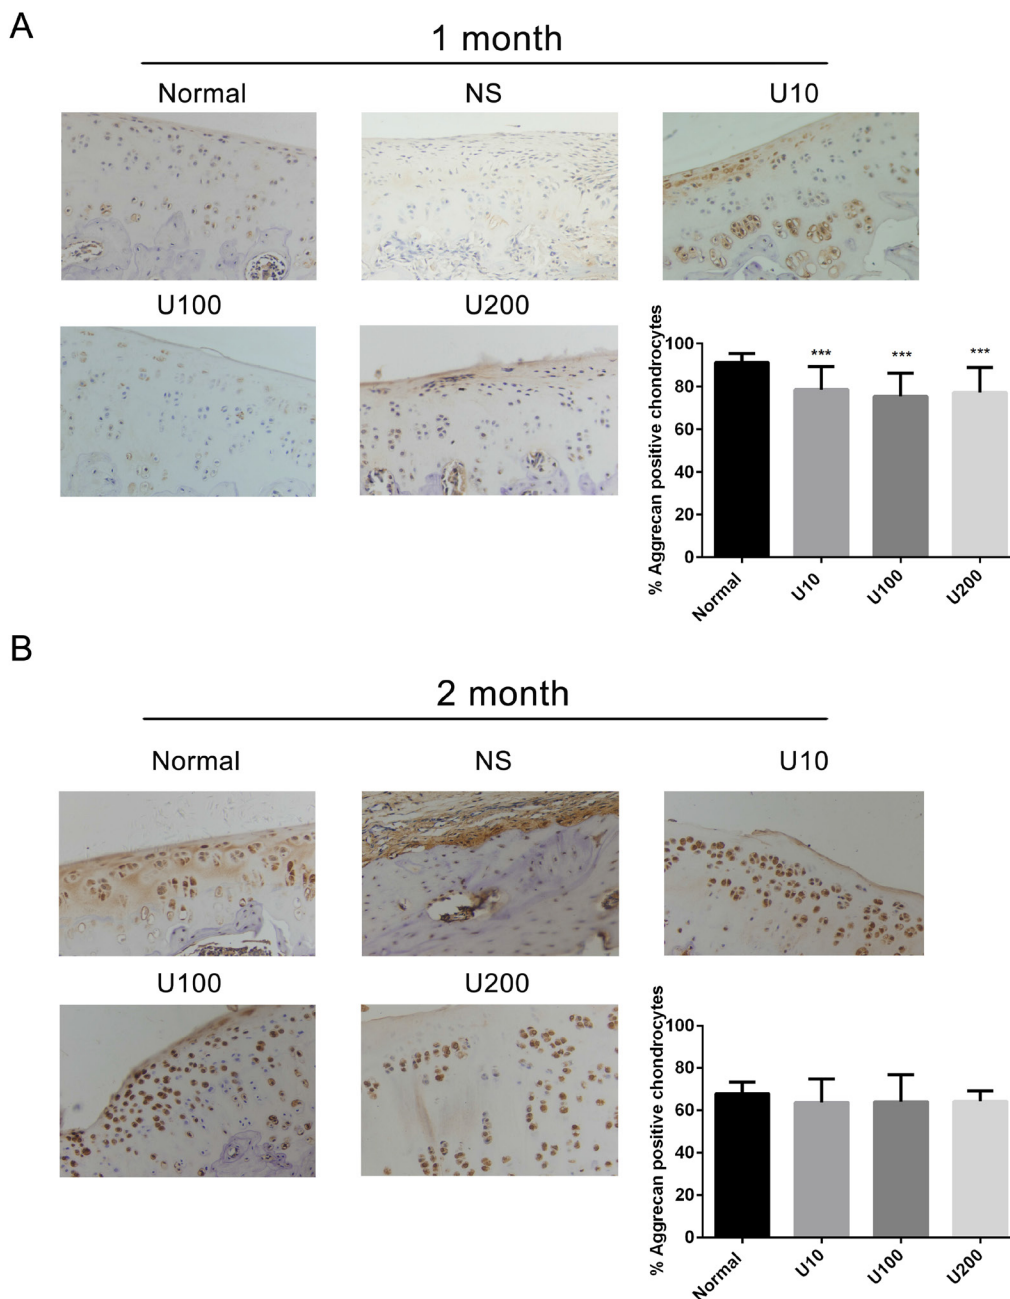

**Figure 3: Effect of PLC $\gamma$ 1 inhibitor on Aggrecan expression in a rat OA model.** Specimens were longitudinally cut into 3  $\mu$ m sections and the levels of Aggrecan expression level were detected by immunohistochemistry technique (original magnification  $\times 200$ ). As described in Material and Methods, the positive chondrocytes were counted and analyzed using Image-Pro Plus 6.0 Software and GraphPad Prism version 5. **(A)** Representative images from rats treated by PLC $\gamma$ 1 inhibitor for 1 month after ACLT+MMx (original magnification  $\times 200$ ). Graph indicating the percentage of positive chondrocytes expressing Aggrecan (\*\*\* $P < 0.001$ , vs normal group). **(B)** Representative images from rats treated by PLC $\gamma$ 1 inhibitor for 2 month after ACLT+MMx (original magnification  $\times 200$ ). Graph indicating the percentage of positive chondrocytes expressing Aggrecan.

Akt induced by extracellular factors or agents could promote cell proliferation and matrix synthesis to protect chondrocytes from OA degeneration [15–19]. Our data that no significant decrease of cartilage thickness and increase of OARSI scores were noted in TCN (Akt inhibitor)-treated rat OA model (Figures 1 and 2) demonstrates that the inhibition of Akt could

not dramatically aggravate OA degeneration, implying the role of Akt may be inferior to that of PLC $\gamma$ 1 in OA pathogenesis. Perhaps, the intra-articular injection by Akt inhibitor interfered with many signal molecular cascades so as to have no obvious effect on OA pathogenesis. That the Akt/S473A mutant significantly suppressed matrix synthesis in human OA chondrocytes (Figure 7D) may be

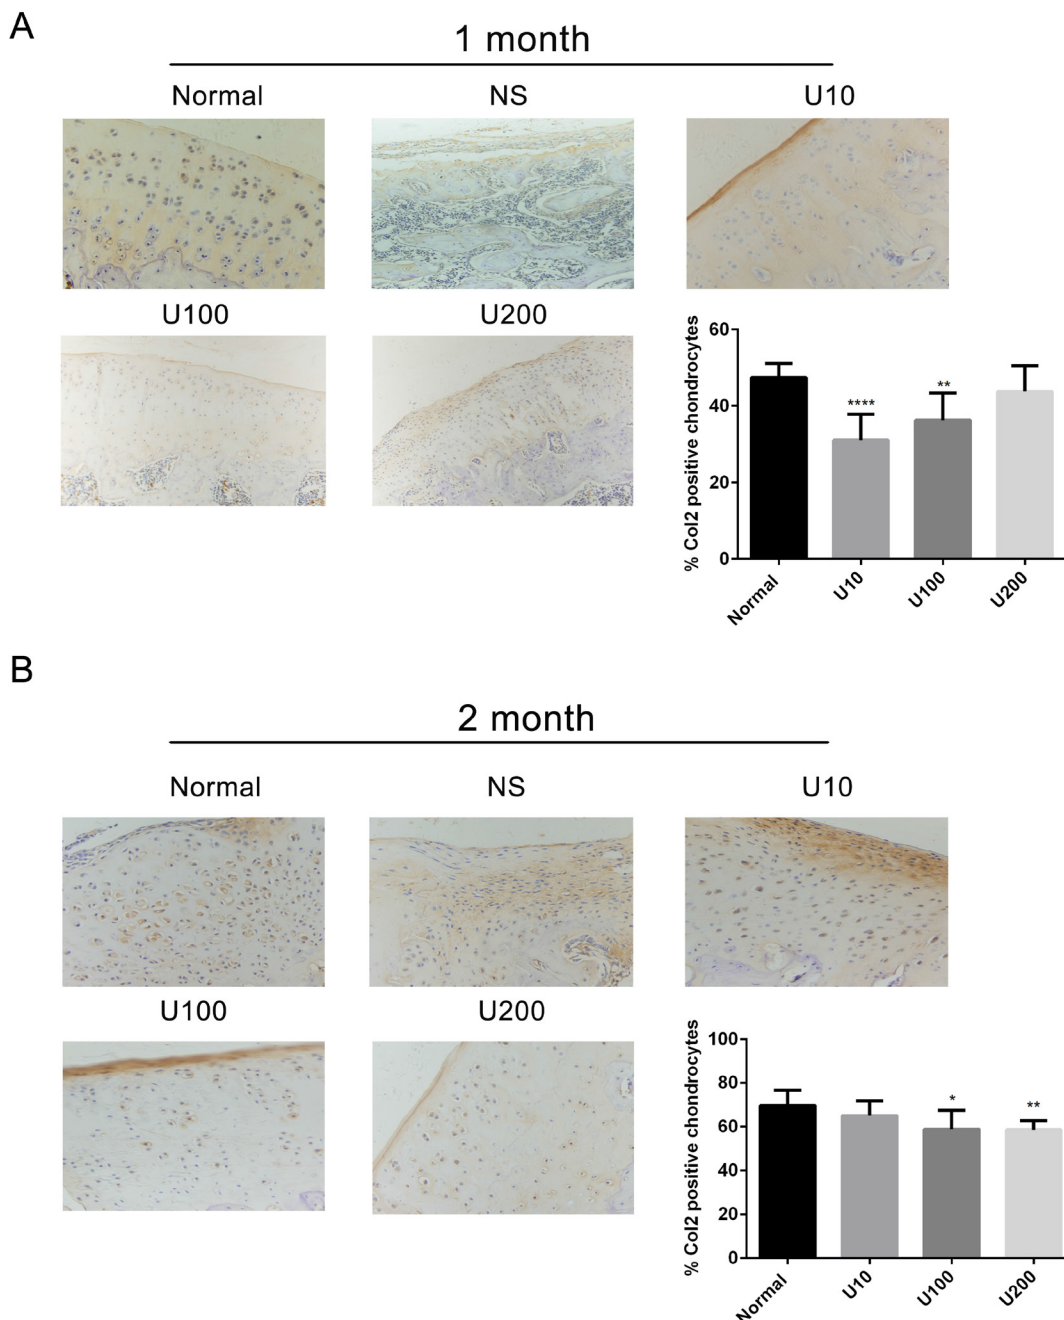

**Figure 4: Effect of PLC $\gamma$ 1 inhibitor on Col 2 expression in a rat OA model.** Specimens were longitudinally cut into 3  $\mu$ m sections and the levels of Aggrecan expression level were detected by immunohistochemistry technique (original magnification  $\times 200$ ). As described in Material and Methods, the positive chondrocytes were counted and analyzed using Image-Pro Plus 6.0 Software and GraphPad Prism version 5. (A) Representative images from rats treated by PLC $\gamma$ 1 inhibitor for 1 month after ACLT+MMx (original magnification  $\times 200$ ). Graph indicating the percentage of positive chondrocytes expressing Col2 (\*\* $P < 0.01$ , \*\*\*\* $P < 0.0001$ , vs normal group). (B) Representative images from rats treated by PLC $\gamma$ 1 inhibitor for 2 month after ACLT+MMx (original magnification  $\times 200$ ). Graph indicating the percentage of positive chondrocytes expressing Col 2 (\* $P < 0.05$ , \*\* $P < 0.01$ , vs normal group).

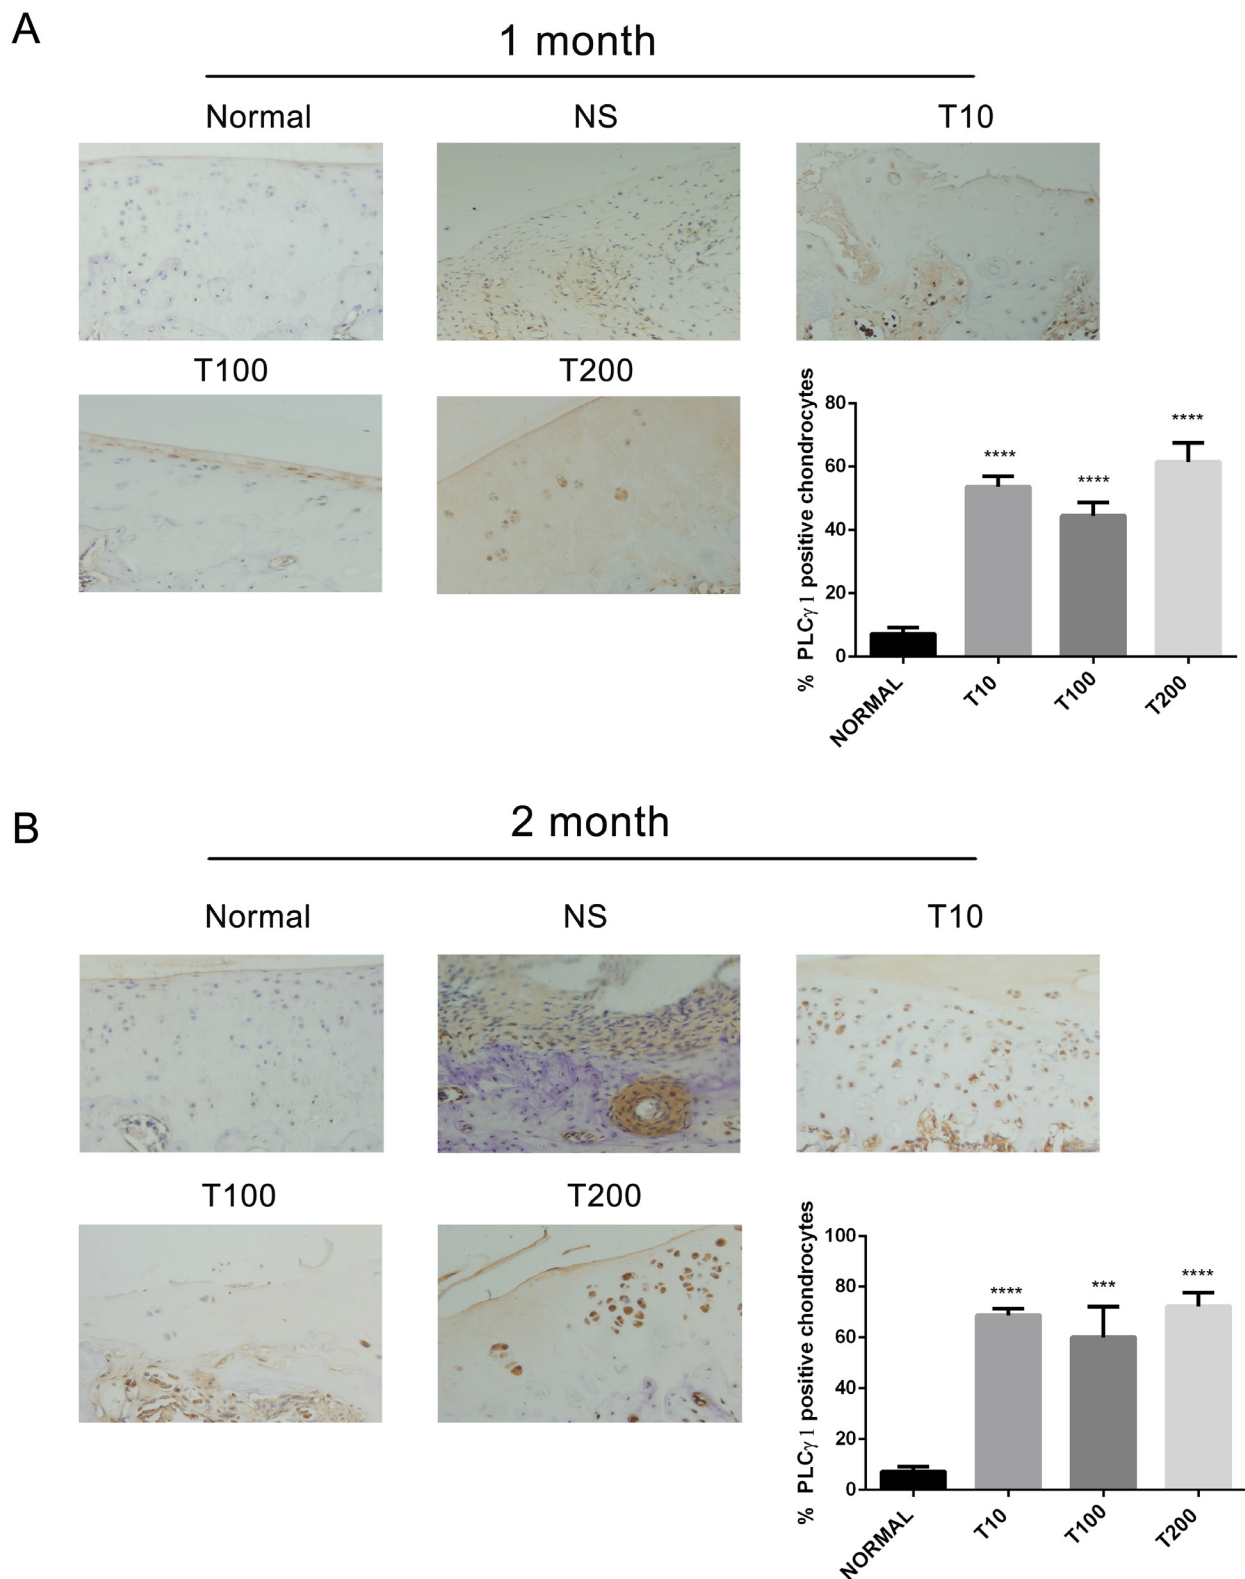

**Figure 5: Effect of Akt inhibitor on PLC $\gamma$ 1 expression in a rat OA model.** Specimens were longitudinally cut into 3  $\mu$ m sections and the levels of Aggrecan expression level were detected by immunohistochemistry technique (original magnification  $\times 200$ ). As described in Material and Methods, the positive chondrocytes were counted and analyzed using Image-Pro Plus 6.0 Software and GraphPad Prism version 5. **(A)** Representative images from rats treated by Akt inhibitor for 1 month after ACLT+MMx (original magnification  $\times 200$ ). Graph indicating the percentage of positive chondrocytes expressing PLC $\gamma$ 1 (\*\*\*\* $P < 0.0001$ , vs normal group). **(B)** Representative images from rats treated by Akt inhibitor for 2 month after ACLT+MMx (original magnification  $\times 200$ ). Graph indicating the percentage of positive chondrocytes expressing PLC $\gamma$ 1 (\*\* $P < 0.001$ , \*\*\*\* $P < 0.0001$ , vs normal group).



due to the discrimination between Akt/S473A mutant and inhibitor or intracellular and animal microenvironment. From the aforementioned data, we suggest that PLC $\gamma$ 1 inhibition may provide more attractive therapeutic target for OA therapy, than Akt activation.

In agreement with Wang Y *et al.* study that Akt binds to and phosphorylates PLC $\gamma$ 1 in response to epidermal growth factor [24], there was a binding between PLC $\gamma$ 1 and Akt in OA chondrocytes (Figure 7E and 7F). Moreover, we found that the binding between them

was regulated by their phosphorylation levels. As Akt/S473A mutant suppressed matrix synthesis, the data that it led to the increased binding between PLC $\gamma$ 1 and Akt imply that the increased binding may aggravate matrix degradation. Similarly, PLC $\gamma$ 1/Y783A mutant that could promote matrix synthesis attenuated the binding between them, suggesting that the decreased binding conferred a benefit for matrix synthesis. Combined with the data that there was a mutual antagonism between PLC $\gamma$ 1 and Akt inhibitors in a rat OA model (Figures 5 and 6), the binding

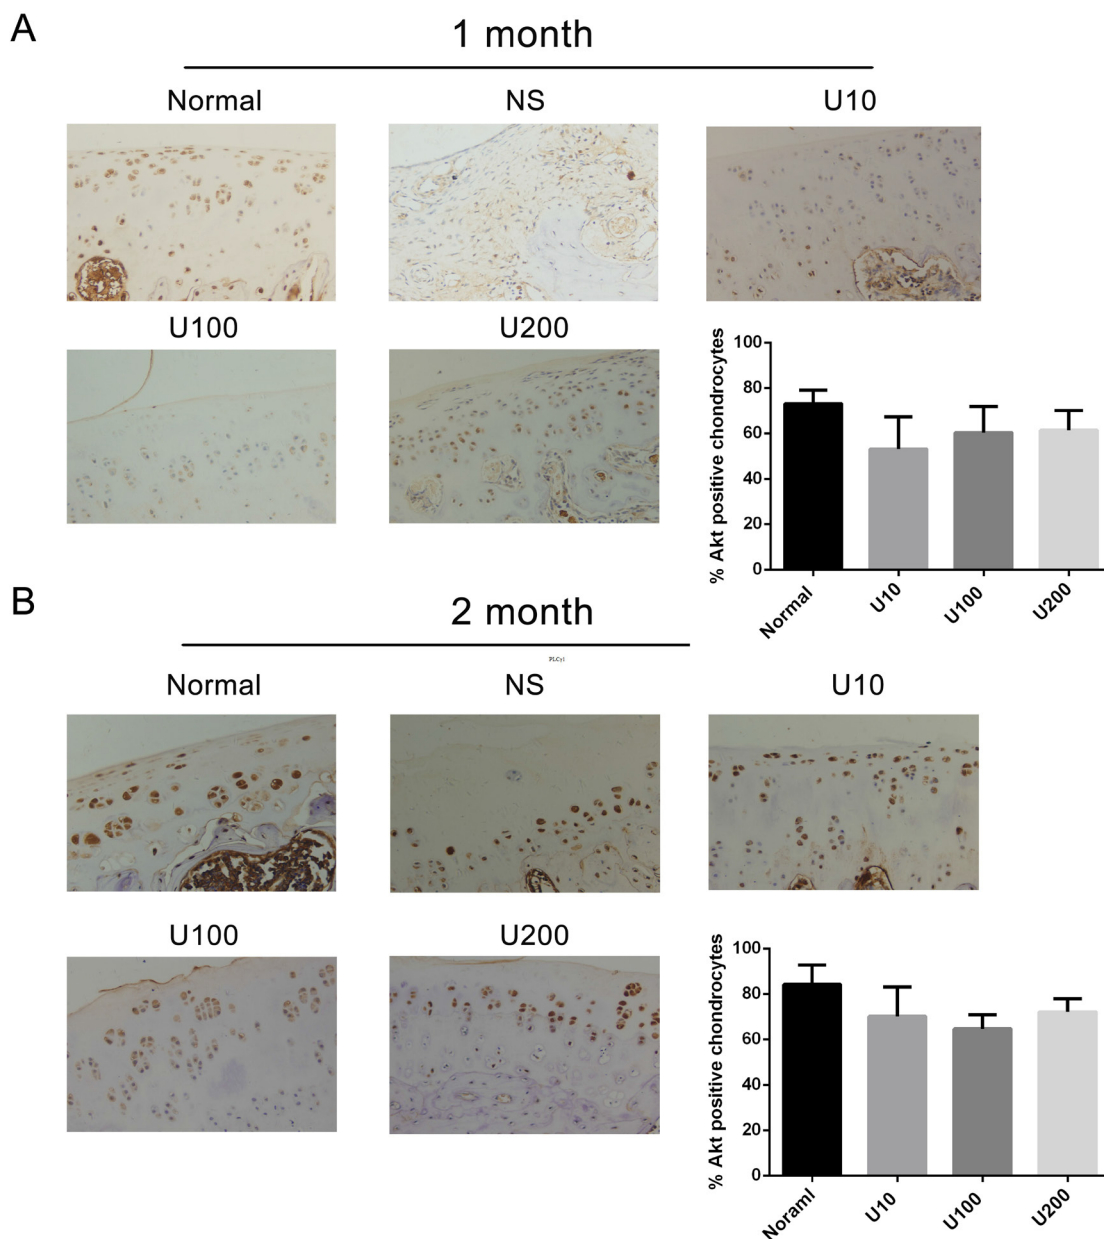

**Figure 6: Effect of PLC $\gamma$ 1 inhibitor on Akt expression in a rat OA model.** Specimens were longitudinally cut into 3  $\mu$ m sections and the levels of Aggrecan expression level were detected by immunohistochemistry technique (original magnification  $\times 200$ ). As described in Material and Methods, the positive chondrocytes were counted and analyzed using Image-Pro Plus 6.0 Software and GraphPad Prism version 5. (A) Representative images from rats treated by PLC $\gamma$ 1 inhibitor for 1 month after ACLT+MMx (original magnification  $\times 200$ ). Graph indicating the percentage of positive chondrocytes expressing Akt. (B) Representative images from rats treated by PLC $\gamma$ 1 inhibitor for 2 month after ACLT+MMx (original magnification  $\times 200$ ). Graph indicating the percentage of positive chondrocytes expressing Akt.

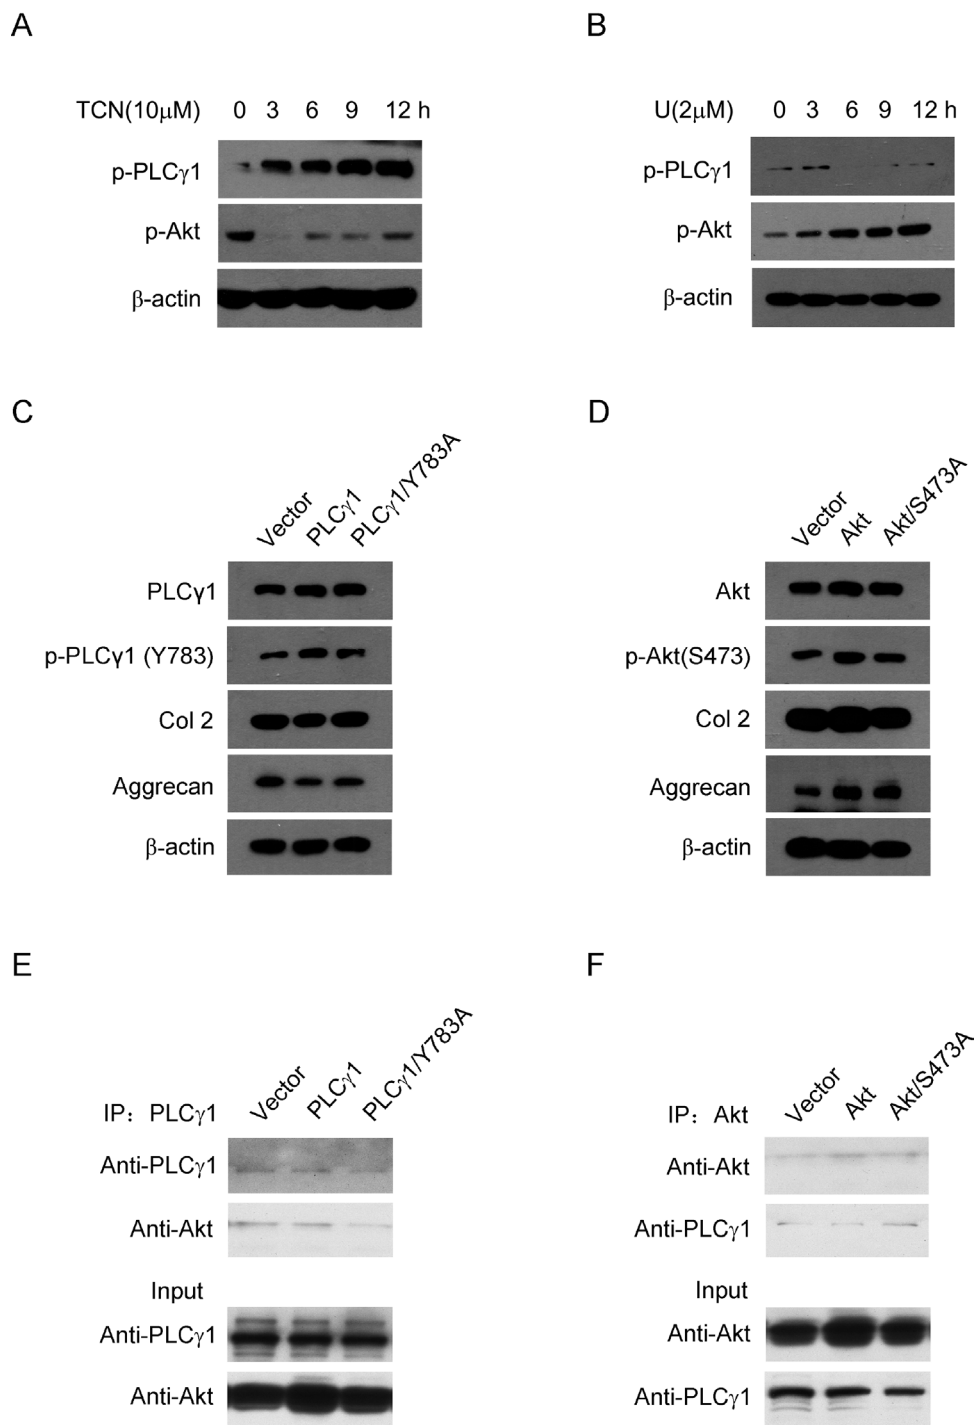

**Figure 7: Relationship between PLC $\gamma$ 1 and Akt in OA chondrocytes.** (A and B) Rat OA model chondrocytes by IL-1 $\beta$  pre-treatment were treated with U73122 (2  $\mu$ M) and TCN (10  $\mu$ M) for 3, 6, 9, 12 h, respectively. P-PLC $\gamma$ 1, p-Akt, and  $\beta$ -actin levels were detected by western blotting analysis using anti-p-PLC $\gamma$ 1, p-Akt, and  $\beta$ -actin antibodies. (C) Rat OA model chondrocytes by IL-1 $\beta$  pre-treatment were transfected with HA-PLC $\gamma$ 1 and HA-PLC $\gamma$ 1 Y783A vectors for 48 h, respectively, and PLC $\gamma$ 1, p-PLC $\gamma$ 1, Col 2, Aggrecan, and  $\beta$ -actin levels were detected by western blotting analysis using anti-PLC $\gamma$ 1, p-PLC $\gamma$ 1, Col 2, Aggrecan, and  $\beta$ -actin antibodies. (D) Rat OA model chondrocytes by IL-1 $\beta$  pre-treatment were transfected with myc-Akt and myc-Akt S473A for 48 h, respectively, and Akt, p-Akt, Col 2, Aggrecan, and  $\beta$ -actin levels were detected by western blotting using anti-Akt, p-Akt, Col2, Aggrecan, and  $\beta$ -actin antibodies. (E) Human OA Chondrocytes were transfected with HA-PLC $\gamma$ 1 and HA-PLC $\gamma$ 1 Y783A vectors for 48 h, respectively. Cell lysates were immunoprecipitated with PLC $\gamma$ 1 antibody, and then subjected to western blotting analysis with PLC $\gamma$ 1 and Akt antibodies. (F) Human OA Chondrocytes were transfected with myc-Akt and myc-Akt S473A for 48 h, respectively. Cell lysates were immunoprecipitated with Akt antibody, and then subjected to western blotting analysis with PLC $\gamma$ 1 and Akt antibodies. The same lysates were applied to ascertain the position and expression of PLC $\gamma$ 1 and Akt by western blotting analysis (Input). Data is representative of three independent experiments.

between PLC $\gamma$ 1 and Akt might be required for the mutual antagonism between them in OA chondrocytes, which will be studied in the future.

In conclusions, PLC $\gamma$  inhibition by its pharmaceutical inhibitor or PLC $\gamma$ 1/Y783A mutant could protect chondrocytes from OA degeneration in both a rat OA model and human OA chondrocytes, and that there is a mutual antagonism between PLC $\gamma$ 1 and Akt in a rat OA model (Figure 8). Furthermore, there was a binding between PLC $\gamma$ 1 and Akt, which was partially regulated by their phosphorylation levels in human OA chondrocytes. It is suggested that the inhibition of PLC $\gamma$ 1 may serve as a better solution for OA therapy, associated with the binding between PLC $\gamma$ 1 and Akt in OA chondrocytes.

## MATERIALS AND METHODS

### Reagents and antibodies

The antibodies against PLC $\gamma$ 1, p-PLC $\gamma$ 1 (Y783), Akt, p-Akt (S473), Aggrecan, Col 2, and  $\beta$ -actin were purchased from Cell Signalling Technology, Inc. (Beverly, MA, USA) and Santa Cruz Biotechnology (Santa Cruz, Fremont, CA, USA), respectively. Unless otherwise specified, inhibitors U73122 (U), Triciribine (TCN), and the rest of the reagents were purchased from Sigma-Aldrich (St. Louis, MO, USA).

### Establishment of a rat experimental model of OA

The protocol was approved by the Committee on the Ethics of Animal Experiments of the University of Xiamen (ID no.20140306). 9-week-old male Sprague–Dawley rats (250–300 g) were acclimatized to the laboratory environment for 1 week before the experiments and were

randomly divided into two parts, 1 and 2 months. Each part included nine groups ( $n = 4$ ), such as normal, OA, NS (intra-articular injection by 0.9% normal saline as control group), U73122 (U) (10  $\mu$ g/kg, 100  $\mu$ g/kg, 200  $\mu$ g/kg), and Triciribine (TCN) (10  $\mu$ g/kg, 100  $\mu$ g/kg, 200  $\mu$ g/kg). The rat experimental model of OA was induced with anterior cruciate ligament transection in combination with resection of medial menisci (ACLT + MMx) as previously described [18, 19]. The right knee joint of each rat was the experimental joint. After the 4th week post-surgery, different doses of inhibitors or NS were injected into the knee joints once every five days, and rats were not killed until 1 and 2 months after injection, respectively. This study was carried out in strict accordance with the recommendations in the Guide for the Care and Use of Laboratory Animals of the National Institutes of Health.

### Histopathological assay and evaluation for articular cartilage degeneration

The fresh samples were fixed in 4% paraformaldehyde for 48 h followed with decalcification in 10% EDTA-2Na for 3 weeks, and then paraffin-embedded for further routine histological preparation. Three micrometer-thick sections were deparaffinized in xylene and rehydrated in graded alcohols and distilled water prior to H.E. and Safranin O–Fast green stainings as previously described [18, 19]. The articular cartilage thickness of each femur condyle (from superficial zone to tidemark) was measured using Image-Pro Plus 6.0 software. According to OARSI scoring system established for grading OA changes [25], and semi-quantitative histopathological grading was performed using VS120-S6 (Olympus, Japan) by two different blinded pathologists, for a maximum possible score of 6. Grade 0 represents

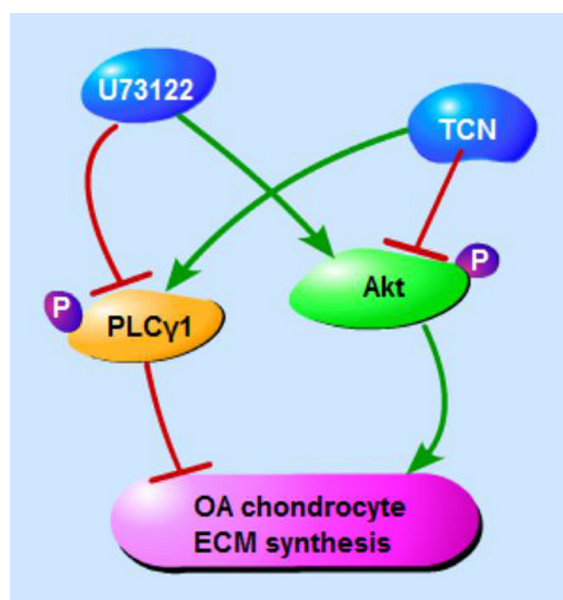

Figure 8: Schematic diagram of PLC $\gamma$ 1 and Akt regulating ECM synthesis of OA chondrocyte.

**Table 1: Information of OA patients with total knee replacement surgery**

| Age(Y) | Case | Sex |    | Duration of OA(Y) |    | *K.L. Image Criterion |    | Pro-treatment |
|--------|------|-----|----|-------------------|----|-----------------------|----|---------------|
|        |      | M   | F  | ≤3                | >3 | III                   | IV | Arthroscopy   |
| ≤65    | 32   | 10  | 22 | 10                | 22 | 1                     | 31 | 12            |
| >65    | 47   | 6   | 41 | 2                 | 45 | 4                     | 43 | 19            |

normal articular cartilage and increasing grade indicates a more biologically cartilage degeneration.

### Immunohistochemistry assay

According to the manufacturer's instructions (MAIXIN.BIO, Fuzhou, China), the sections were incubated overnight at 4°C with primary antibody: Col II (1: 1000), Aggrecan (1:800), PLCγ1 (1:200), and Akt (1:200) dilutions, respectively, prior to incubation with secondary antibodies. Diaminobenzidine (DAB) was then used to visualize the immunohistochemical reaction followed by being counterstained with haematoxylin. Finally, dark brown cells were considered to be positive. Photomicrographs were taken with OLYMPUS BX41 microscope equipped with a digital camera. The percentage of positive chondrocytes was measured and analyzed using Image-Pro Plus 6.0 Software and GraphPad Prism version 5, representing relative protein expression level [22, 23].

### Chondrocyte isolation and culture

Neonatal male Sprague–Dawley rats (within 24–72 hrs after birth) were killed after approval of the ethical Committee of Medical School, Xiamen University (ID No. 20110920). Articular cartilages of rat hind limbs were removed under sterile conditions and chondrocytes were then cultured as previously described [17, 18, 26]. F1 generation was treated with IL-1β (20 ng/ml) for 36 hr prior to the subsequent experiments.

In addition, after receiving all patient consent and in accordance with the hospital ethical guidelines approved by the Ethics Committee of Zhongshan Hospital, Xiamen University (ID No. 20100426), China, human OA cartilage was obtained from 79 patients (aged 42–74 years, 16 males and 63 females) with advanced OA who were undergoing total knee replacement surgery (Table 1). As described previously [19, 27], primary chondrocytes were cultured in Dulbecco's modified Eagle's medium (DMEM) containing 10% fetal bovine serum to 80% confluence and plated in 60-mm Petri dishes for the subsequent experiments. All of our clinical studies have been conducted according to the principles expressed in the Declaration of Helsinki.

### Western blotting and immunoprecipitation assay

Protein extracts were subjected to SDS-PAGE (6–10%, according to the molecular weight of protein) and transferred to PVDF membranes (Millipore, MA, USA) for western blotting analysis as described in previous

studies [28, 29]. The signal was monitored using a chemiluminescent detection system according to the manufacturer's instructions (Pierce, Rockford, IL, USA).

As described previously [29, 30], protein extracts were lysed and 400 μg protein were mixed with 8 μl Protein A&G Sepharose (Sigma-Aldrich, Shanghai, China) and 8 μl anti-Akt or PLCγ antibody or immunoglobulin (IgG) control for 3 h at 4°C. The protein-antibody complexes that were recovered on the beads were subjected to Western blot analysis as above.

### Statistics analysis

All data were expressed as the means ± S.E.M. for three or five independent experiments for each group. The differences between the groups were examined for statistical significance using the unpaired *t*-test with GraphPad Prism version 5 (GraphPad Software, Inc., San Diego, CA, USA). A value of *P* < 0.05 was considered as being significant.

### Abbreviations

Phosphoinositide-specific phospholipase γ (PLCγ); protein kinase B (PKB/Akt); U73122 (U); Triciribine (TCN); Hematoxylin & Eosin (H.E.); anterior cruciate ligament transection in combination with resection of medial menisci (ACLT + MMx); tissue inhibitor of metalloproteinase (TIMP-1); a disintegrin and metalloproteinase with thrombospondin motifs 5 (ADAMTS-5).

### Author contributions

H. Cai and N. Qu performed most of the experiments. X.C. and B.Z. conceived and designed the experiments. X.C. and Y.Z. replenished some experiments. X.Zheng, X.C., and B.Z. analyzed the data and wrote the paper. All authors reviewed the manuscript.

### CONFLICTS OF INTEREST

The authors have no conflicts of interest to disclose.

### FUNDING

This study was supported by the National Natural Science Foundation of China (No. 81371952, 81572189) and the Natural Science Foundation of Xiamen, China (No. 3502Z20159014, 3502Z20154018).

## REFERENCES

1. Beier F, Loeser RF. Biology and pathology of Rho GTPase, PI-3 kinase-Akt, and MAP kinase signaling pathways in chondrocytes. *J Cell Biochem.* 2010; 110:573–80. <https://doi.org/10.1002/jcb.22604>.
2. Deng SL, Zhu J, Huang Q, Fu WL, Li Q, Chen G, Tang X, Li J. Lentiviral vector-mediated shRNAs targeting a functional isoform of the leptin receptor (Ob-Rb) inhibit cartilage degeneration in a rat model of osteoarthritis. *Osteoarthritis Cartilage.* 2017; 25:1912–1921. <https://doi.org/10.1016/j.joca.2017.08.003>.
3. Takayama K, Kawakami Y, Kobayashi M, Greco N, Cummins JH, Matsushita T, Kuroda R, Kurosaka M, Fu FH, Huard J. Local intra-articular injection of rapamycin delays articular cartilage degeneration in a murine model of osteoarthritis. *Arthritis Res Ther.* 2014; 16:482. <https://doi.org/10.1186/s13075-014-0482-4>.
4. Zhang Y, Vasheghani F, Li YH, Blati M, Simeone K, Fahmi H, Lussier B, Roughley P, Lagares D, Pelletier JP, Martel-Pelletier J, Kapoor M. Cartilage-specific deletion of mTOR upregulates autophagy and protects mice from osteoarthritis. *Ann Rheum Dis.* 2015; 74:1432–40. <https://doi.org/10.1136/annrheumdis-2013-204599>.
5. Rosenberg JH, Rai V, Dilisio MF, Agrawal DK. Damage-associated molecular patterns in the pathogenesis of osteoarthritis: potentially novel therapeutic targets. *Mol Cell Biochem.* 2017; 434:171–179. <https://doi.org/10.1007/s11010-017-3047-4>.
6. Lattanzio R, Piantelli M, Falasca M. Role of phospholipase C in cell invasion and metastasis. *Adv Biol Regul.* 2013; 53:309–18.
7. Elbaradie KB, Wang Y, Boyan BD, Schwartz Z. Sex-specific response of rat costochondral cartilage growth plate chondrocytes to 17 $\beta$ -estradiol involves differential regulation of plasma membrane associated estrogen receptors. *Biochim Biophys Acta.* 2013; 1833:1165–72. <https://doi.org/10.1016/j.bbamer.2012.12.022>.
8. Nong L, Yin G, Ren K, Tang J, Fan W. Periodic mechanical stress enhances rat chondrocyte area expansion and migration through Src-PLC $\gamma$ 1-ERK1/2 signaling. *Eur J Cell Biol.* 2010; 89:705–11. <https://doi.org/10.1016/j.ejcb.2010.04.005>.
9. Harada D, Yamanaka Y, Ueda K, Nishimura R, Morishima T, Seino Y, Tanaka H. Sustained phosphorylation of mutated FGFR3 is a crucial feature of genetic dwarfism and induces apoptosis in the ATDC5 chondrogenic cell line via PLC $\gamma$ 1-activated STAT1. *Bone.* 2007; 41:273–81.
10. Lu Y, Xu Y, Yin Z, Yang X, Jiang Y, Gui J. Chondrocyte migration affects tissue-engineered cartilage integration by activating the signal transduction pathways involving Src, PLC $\gamma$ 1, and ERK1/2. *Tissue Eng Part A.* 2013; 19:2506–18.
11. Ren K, Ma Y, Huang Y, Liang W, Liu F, Wang Q, Cui W, Liu Z, Yin G, Fan W. Periodic mechanical stress activates MEK1/2-ERK1/2 mitogenic signals in rat chondrocytes through Src and PLC $\gamma$ 1. *Braz J Med Biol Res.* 2011; 44:1231–42.
12. Xiao J, Chen X, Xu L, Zhang Y, Yin Q, Wang F. PDGF regulates chondrocyte proliferation through activation of the GIT1- and PLC $\gamma$ 1-mediated ERK1/2 signaling pathway. *Mol Med Rep.* 2014; 10:2409–14. <https://doi.org/10.3892/mmr.2014.2506>.
13. Zeng G, Cui X, Liu Z, Zhao H, Zheng X, Zhang B, Xia C. Disruption of phosphoinositide-specific phospholipases C $\gamma$ 1 contributes to extracellular matrix synthesis of human osteoarthritis chondrocytes. *Int J Mol Sci.* 2014; 15:13236–46. <https://doi.org/10.3390/ijms150813236>.
14. Liu Z, Cai H, Zheng X, Zhang B, Xia C. The Involvement of Mutual Inhibition of ERK and mTOR in PLC $\gamma$ 1-Mediated MMP-13 Expression in Human Osteoarthritis Chondrocytes. *Int J Mol Sci.* 2015; 16:17857–69. <https://doi.org/10.3390/ijms160817857>.
15. Rosa SC, Rufino AT, Judas F, Tenreiro C, Lopes MC, Mendes AF. Expression and function of the insulin receptor in normal and osteoarthritic human chondrocytes: modulation of anabolic gene expression, glucose transport and GLUT-1 content by insulin. *Osteoarthritis Cartilage.* 2011; 19:719–27. <https://doi.org/10.1016/j.joca.2011.02.004>.
16. Cravero JD, Carlson CS, Im HJ, Yammani RR, Long D, Loeser RF. Increased expression of the Akt/PKB inhibitor TRB3 in osteoarthritic chondrocytes inhibits insulin-like growth factor 1-mediated cell survival and proteoglycan synthesis. *Arthritis Rheum.* 2009; 60:492–500. <https://doi.org/10.1002/art.24225>.
17. Zheng X, Xia C, Chen Z, Huang J, Gao F, Li G, Zhang B. Requirement of the phosphatidylinositol 3-kinase/Akt signaling pathway for the effect of nicotine on interleukin-1 $\beta$ -induced chondrocyte apoptosis in a rat model of osteoarthritis. *Biochem Biophys Res Commun.* 2012; 423:606–12. <https://doi.org/10.1016/j.bbrc.2012.06.045>.
18. Zhao H, Zhang T, Xia C, Shi L, Wang S, Zheng X, Hu T, Zhang B. Berberine ameliorates cartilage degeneration in interleukin-1 $\beta$ -stimulated rat chondrocytes and in a rat model of osteoarthritis via Akt signalling. *J Cell Mol Med.* 2014; 18:283–92. <https://doi.org/10.1111/jcmm.12186>.
19. Cheng L, Zeng G, Liu Z, Zhang B, Cui X, Zhao H, Zheng X, Song G, Kang J, Xia C. Protein kinase B and extracellular signal-regulated kinase contribute to the chondroprotective effect of morroniside on osteoarthritis chondrocytes. *J Cell Mol Med.* 2015; 19:1877–86. <https://doi.org/10.1111/jcmm.12559>.
20. Marshall AJ, Nihiro H, Yun TJ, Clark EA. Regulation of B-cell activation and differentiation by the phosphatidylinositol 3-kinase and phospholipase C $\gamma$  pathway. *Immunol Rev.* 2000; 176:30–46.
21. Tsuchiya A, Kanno T, Nishizaki T. PI3 kinase directly phosphorylates Akt1/2 at Ser473/474 in the insulin signal transduction pathway. *J Endocrinol.* 2013; 220:49–59. <https://doi.org/10.1530/JOE-13-0172>.

22. Browaeys-Poly E, Perdereau D, Lescuyer A, Burnol AF, Cailliau K. Akt interaction with PLC( $\gamma$ ) regulates the G(2)/M transition triggered by FGF receptors from MDA-MB-231 breast cancer cells. *Anticancer Res.* 2009; 29:4965–69.
23. Zhuang L, Zhang B, Zeng G, Dai L, Qian H, Hu T, Song G, Zhang B, Xia C. Metastasis of human gastric adenocarcinoma partly depends on phosphoinositide-specific phospholipase  $\gamma$ 1 expression. *Folia Histochem Cytobiol.* 2014; 52:178–86. <https://doi.org/10.5603/FHC.2014.0021>.
24. Wang Y, Wu J, Wang Z. Akt binds to and phosphorylates phospholipase C- $\gamma$ 1 in response to epidermal growth factor. *Mol Biol Cell.* 2006; 17:2267–77.
25. Pritzker KP, Gay S, Jimenez SA, Ostergaard K, Pelletier JP, Revell PA, Salter D, van den Berg WB. Osteoarthritis cartilage histopathology: grading and staging. *Osteoarthritis Cartilage.* 2006; 14:13–29.
26. Uenaka K, Imai S, Ando K, Matsusue Y. Relation of low-intensity pulsed ultrasound to the cell density of scaffold-free cartilage in a high density static semi-open culture system. *J Orthop Sci.* 2010; 15:816–24.
27. Cui X, Wang S, Cai H, Lin Y, Zheng X, Zhang B, Xia C. Overexpression of microRNA-634 suppresses survival and matrix synthesis of human osteoarthritis chondrocytes by targeting PIK3R1. *Sci Rep.* 2016; 6:23117. <https://doi.org/10.1038/srep23117>.
28. Huang JG, Xia C, Zheng XP, Yi TT, Wang XY, Song G, Zhang B.  $17\beta$ -Estradiol promotes cell proliferation in rat osteoarthritis model chondrocytes via PI3K/Akt pathway. *Cell Mol Biol Lett.* 2011; 16:564–75. <https://doi.org/10.2478/s11658-011-0023-y>.
29. Zhang B, Xia C. 12-O-tetradecanoylphorbol-1, 3-acetate induces the negative regulation of protein kinase B by protein kinase  $\alpha$  during gastric cancer cell apoptosis. *Cell Mol Biol Lett.* 2010; 15:377–94. <https://doi.org/10.2478/s11658-010-0014-4>.
30. Wu Q, Lin XF, Ye XF, Zhang B, Xie Z, Su WJ. Ubiquitinated or sumoylated retinoic acid receptor  $\alpha$  determines its characteristic and interacting model with retinoid X receptor  $\alpha$  in gastric and breast cancer cells. *J Mol Endocrinol.* 2004; 32:595–613.
